# Supplementary material
Source: PubMed Central journal article supplement (PMC7984254)
Supplement: NIHMS1681046-supplement-1.pdf [file NIHMS1681046-supplement-1.pdf]

**SUPPLEMENTARY MATERIAL (for online publication only)**

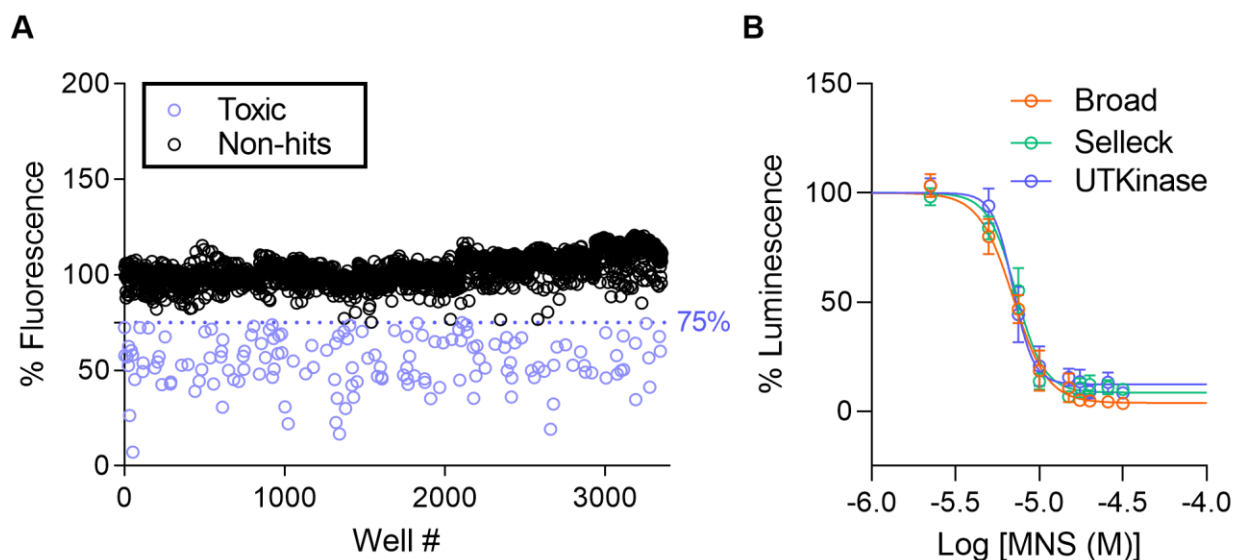

**Supplementary Figure 1. HTS assay controls and toxicity counter-screen.** (A) Cell viability assay results for the Broad, Selleck and UTKinase libraries. Cut-offs for compound toxicity were set at 75% fluorescence (relative to the mean for 0.3% DMSO controls). (B) Dose responses of the inhibitory control 3,4-Methylenedioxy- $\beta$ -nitrostyrene (MNS) on screened plates (9 concentrations;  $n = 2$  per concentration) to monitor and verify reproducibility between screened plates, ensuring that there were not changes in cell density or other cell behaviors, which often can be detected through changes in the concentration dependency[25]. For all plates of each library screened (Broad, Selleck, and UTKinase), the mean normalized luminescence  $\pm$  SD is shown for each concentration with fitted non-linear regression curves.

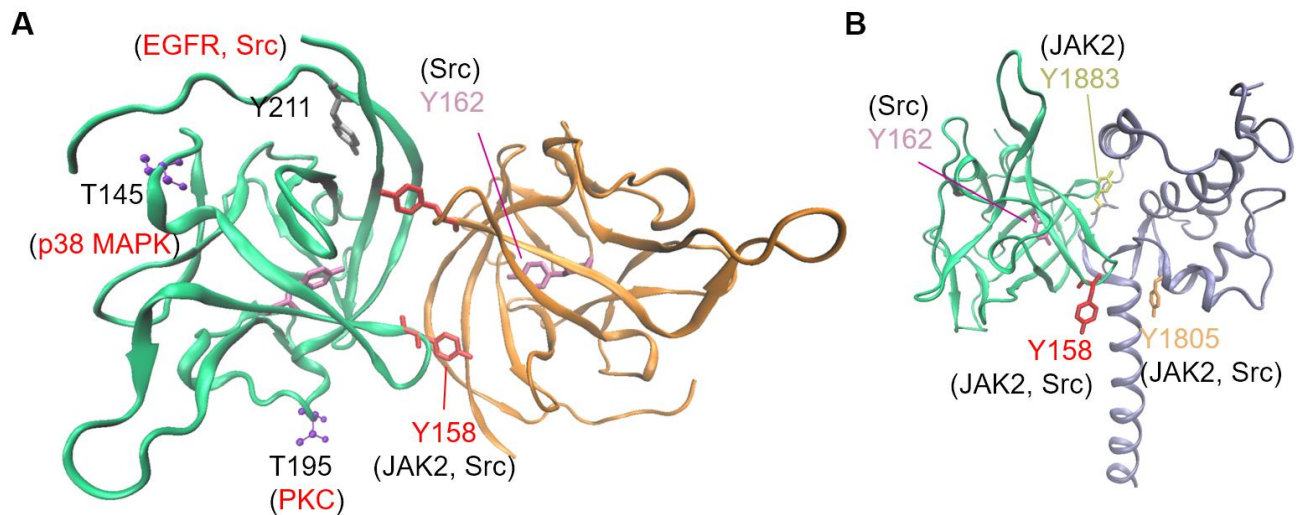

**Supplementary Figure 2. Structural relationship of potential phosphorylation sites to the PPI interfaces of the FGF14:FGF14 homodimer and FGF14:Nav1.6 complex. (A)** Model of the FGF14:FGF14 homodimer homology model, based on the FGF13 homodimer crystal structure (PDB: 3HBW) with monomer #1 as teal and monomer #2 as orange. Y158 on each is shown as red, while Y162 is shown as pink. Y162 is  $> 10\text{\AA}$  from the PPI surface, and is unlikely to contribute to dimerization. On monomer #1 (teal), also showing other predicted phosphorylation sites that are not at the dimer interface, including T145, T195, and Y211. **(B)** Model of the FGF14:Nav1.6 C-tail complex, based on the FGF13:Nav1.5:CaM ternary complex crystal structure (PDB: 4DCK). Predicted Src and JAK2 phosphorylation sites on both FGF14 and Nav1.6 C-tail are shown. Also note that two SCN8A mutations leading to epileptic encephalopathies are found in the proximal portion of the C-terminus, including the missense mutations causing R1872W and R1871Q [56], which are 11 residues upstream of the Y1883 identified phosphomotif.

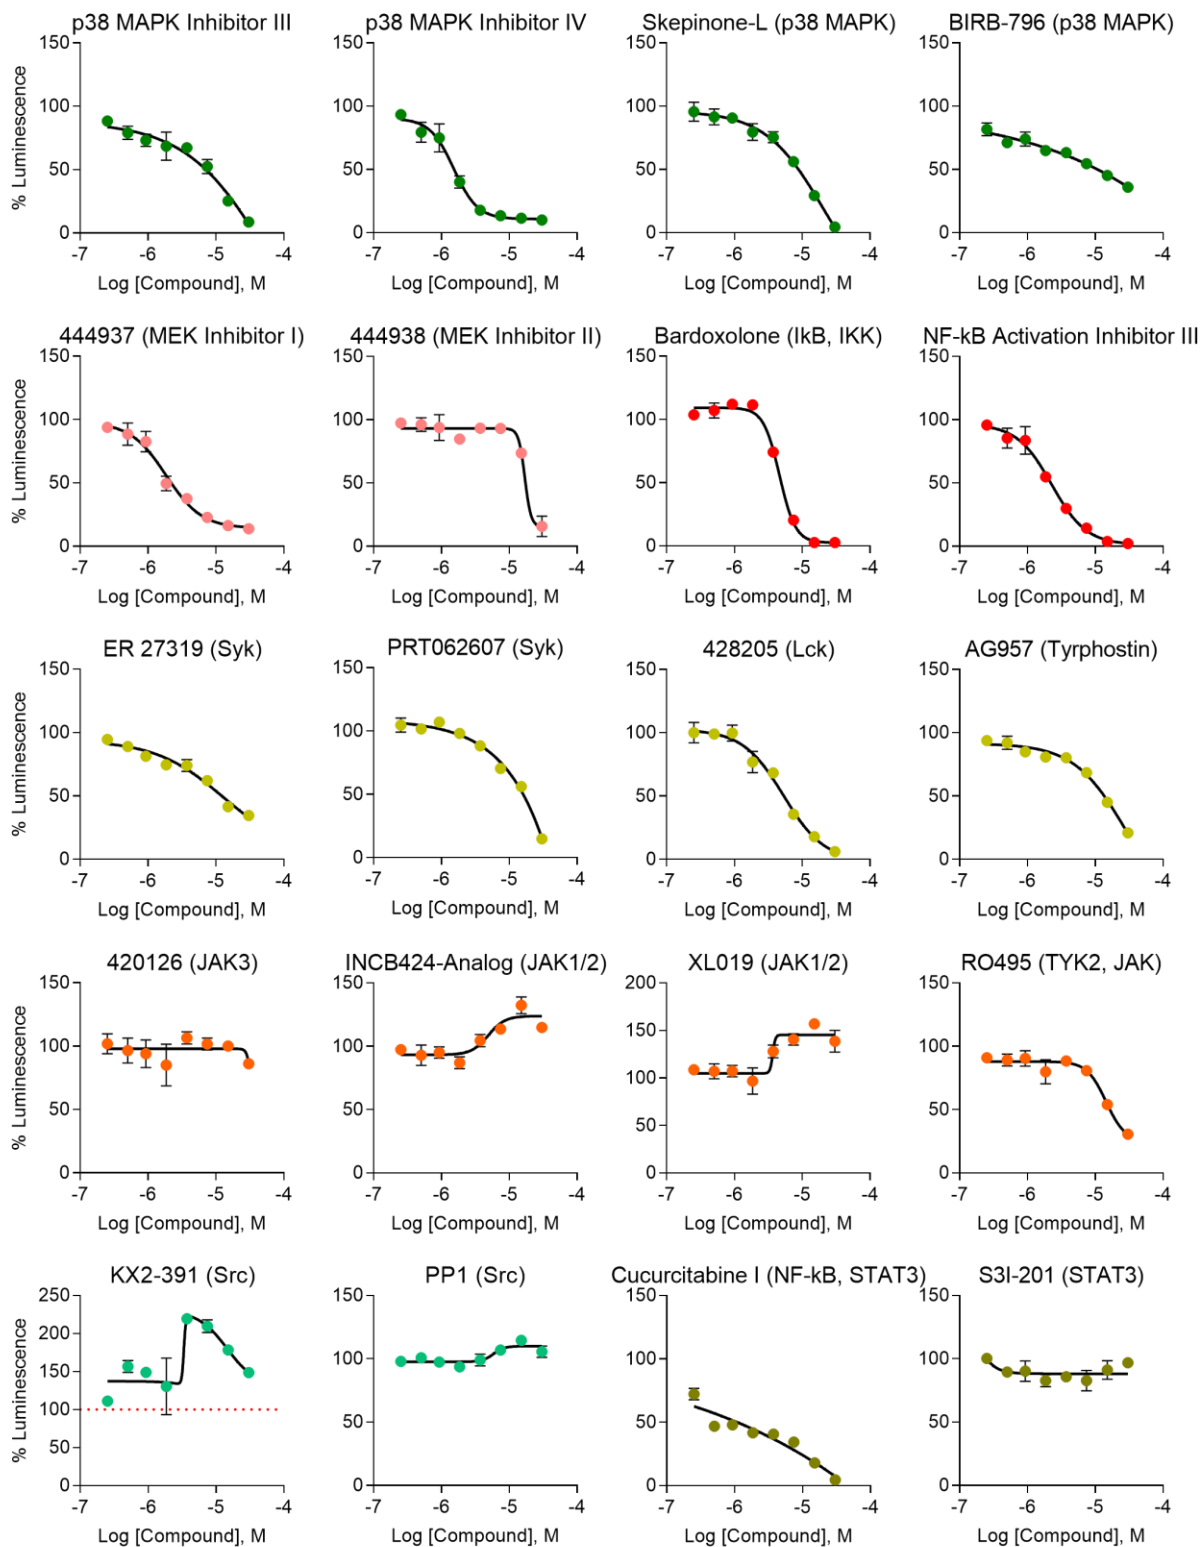

**Supplementary Figure 3. Initial dose-dependency studies of selected hits for validation of HTS findings for other highly represented targets.** Dose responses (8-point,  $n = 4$  per concentration over two 384-well plates) were conducted against the FGF14:Nav1.6 complex using the LCA for HTS hits selected for further studies based on target clustering. Luminescence was normalized to per plate 0.3% DMSO controls, and data shown are mean normalized luminescence  $\pm$  SD.

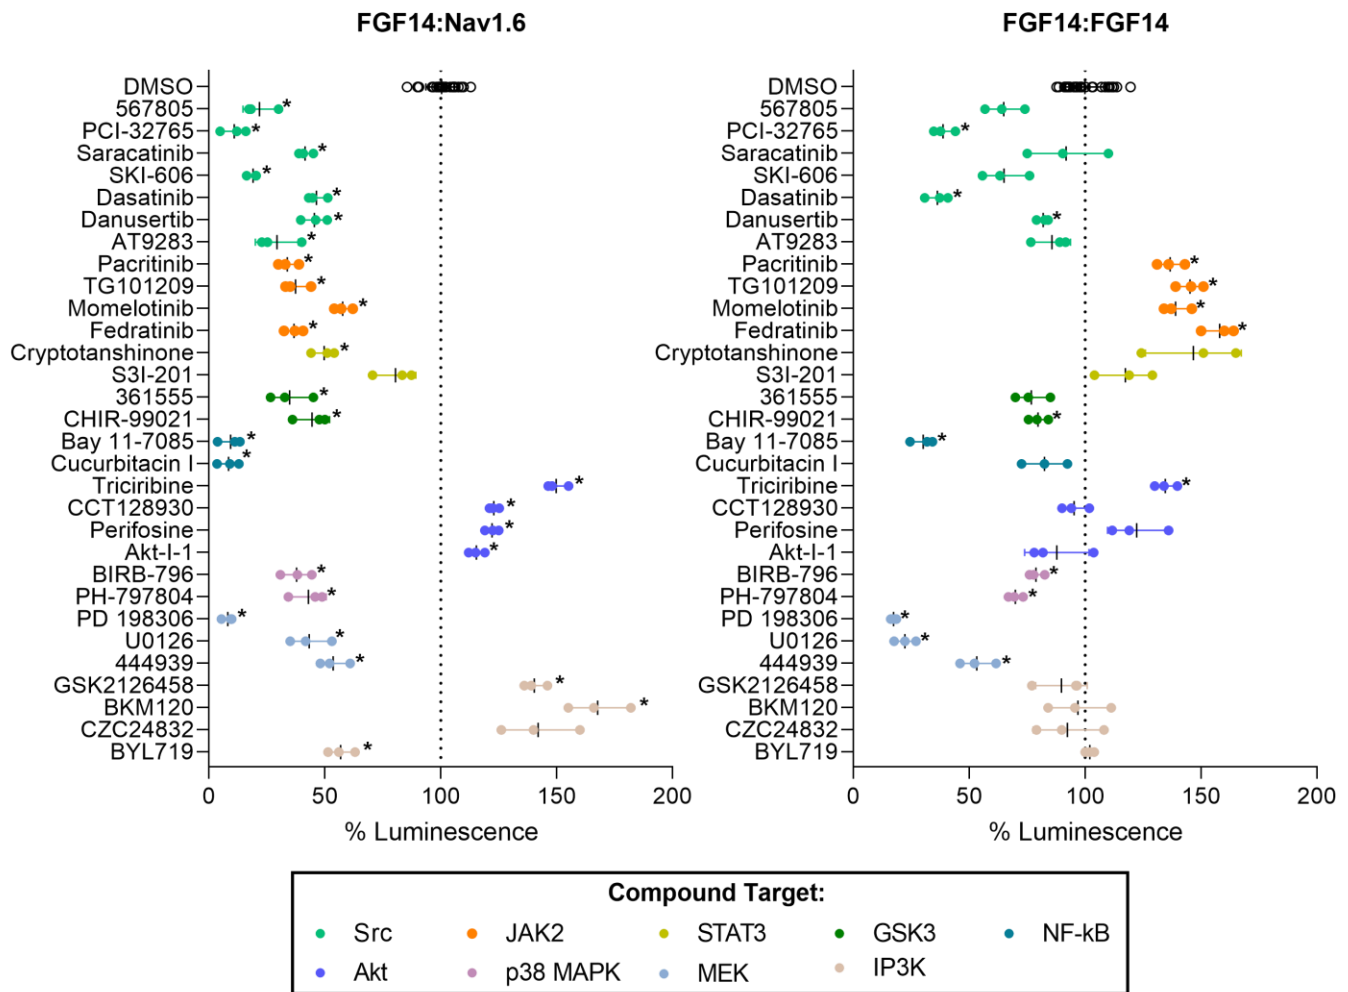

**Supplementary Figure 4. Screening results for kinase inhibitors against the FGF14:Nav1.6 and FGF14:FGF14 homodimer.** LCA results for screening inhibitors of top kinase targets, as selected based on proportion of screened compounds to hits (represented in Table 1), in combination with hypothesis-driven target selection using information including phospho-motif scans and homology modeling (represented in Table 2 and Suppl. Fig. 2). Transfected HEK293 cells were seeded in 384-well plates and treated with 0.3% DMSO ( $n = 32$ ) or kinase inhibitors (30  $\mu$ M;  $n = 3$  per compound). Luminescence was normalized to per plate 0.3% DMSO controls. **Right**, LCA results for the FGF14:Nav1.6 complex. **Left**, LCA results for the FGF14:FGF14 homodimer. These data are represented in the form of a heat map in Figure 3B. Note that only JAK2 inhibitors demonstrated a consistent and opposing response between the FGF14:Nav1.6 complex and FGF14:FGF14 dimer; STAT3 inhibitors demonstrated a similar trend but were non-significant. Data are individual replicate values with mean normalized luminescence  $\pm$  SD. Statistical significance was assessed using Brown-Forsythe and Welch ANOVA with post hoc Dunnett's T3 multiple comparisons test; \* $p < 0.05$ .

## Full Length Luciferase

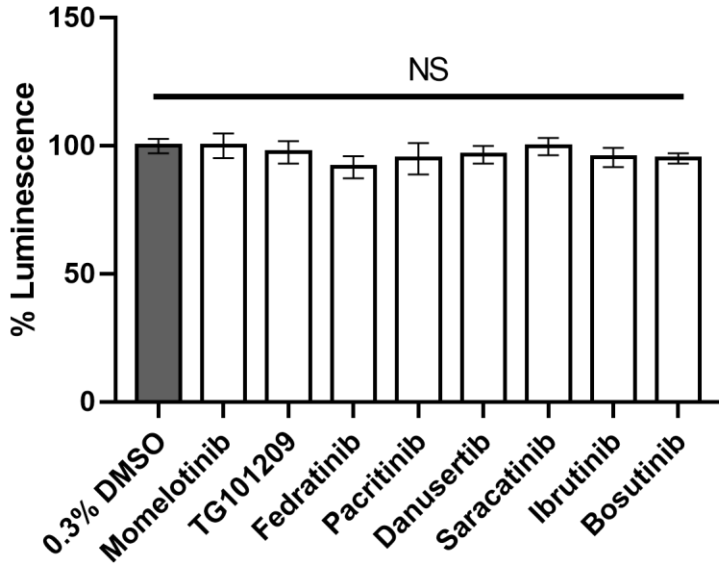

**Supplementary Figure 5. Validation of JAK2 inhibitors using the full-length luciferase assay.** HEK293 cells were transiently transfected with the full length *photinus pyralis* luciferase and seeded in 96-well plates as previously described[20,25], and treated with 0.3% DMSO ( $n = 12$ ) or JAK2 inhibitors (25  $\mu$ M;  $n = 5$  per compound) under conditions identical to those of the LCA. Lack of response against luciferase signifies that these inhibitor's effects on protein complexes using the LCA are not mediated by modulation of luciferase. Luminescence was normalized to 0.3% DMSO controls. Data are mean normalized luminescence  $\pm$  SD. Significance was assessed using one-way ANOVA with post hoc Dunnett's multiple comparisons test.

**Supplementary Table 1. Z'-factor and coefficient of variation for all screened plates from the Broad, Selleck, and UTKinase compound libraries. Z'-factor and coefficient of variation (CV) were calculated as described previously[25,34].**

| Library/Plate | Z'-Factor |          | CV    |
|---------------|-----------|----------|-------|
|               | Inhibitor | Enhancer |       |
| Broad-1A      | 0.621     | 0.698    | 0.102 |
| Broad-2A      | 0.674     | 0.746    | 0.088 |
| Broad-1B      | 0.638     | 0.797    | 0.086 |
| Broad-2B      | 0.671     | 0.808    | 0.096 |
| Broad-1C      | 0.694     | 0.866    | 0.089 |
| Broad-2C      | 0.658     | 0.765    | 0.093 |
| SEL-1A        | 0.616     | 0.839    | 0.100 |
| SEL-2A        | 0.738     | 0.803    | 0.065 |
| SEL-3A        | 0.664     | 0.763    | 0.069 |
| SEL-4A        | 0.749     | 0.875    | 0.060 |
| SEL-1B        | 0.735     | 0.759    | 0.060 |
| SEL-2B        | 0.716     | 0.858    | 0.072 |
| SEL-3B        | 0.739     | 0.831    | 0.062 |
| SEL-4B        | 0.520     | 0.700    | 0.070 |
| SEL-1C        | 0.586     | 0.718    | 0.092 |
| SEL-2C        | 0.557     | 0.675    | 0.106 |
| SEL-3C        | 0.500     | 0.735    | 0.126 |
| SEL-4C        | 0.548     | 0.711    | 0.120 |
| UTK1A         | 0.633     | 0.731    | 0.070 |
| UTK2A         | 0.560     | 0.746    | 0.093 |
| UTK3A         | 0.681     | 0.759    | 0.064 |
| UTK4A         | 0.500     | 0.778    | 0.057 |
| UTK5A         | 0.622     | 0.740    | 0.087 |
| UTK1B         | 0.174     | 0.652    | 0.099 |
| UTK2B         | 0.625     | 0.736    | 0.063 |
| UTK3B         | 0.666     | 0.759    | 0.073 |
| UTK4B         | 0.614     | 0.792    | 0.092 |
| UTK5B         | 0.639     | 0.764    | 0.068 |
| UTK1C         | 0.836     | 0.863    | 0.050 |
| UTK2C         | 0.880     | 0.876    | 0.033 |
| UTK3C         | 0.910     | 0.823    | 0.023 |
| UTK4C         | 0.738     | 0.830    | 0.071 |
| UTK5C         | 0.702     | 0.924    | 0.085 |

**Supplementary Table 2. Screened compounds targeting JAK2 and Src.** The percent fluorescence intensity (% FI) from the CellTiter Blue (CTB) cell viability assay, as well as mean percent luminescence (% Lum), mean Z-score, and their respective standard deviations (SD) from the primary screening (LCA) is shown for each compound from  $n = 3$  independent screenings in 384-well plates. Compounds with screening results near to the hit cut-offs are also shown. Statistical significance was assessed using Brown-Forsythe and Welch ANOVA with post hoc Dunnett's T3 multiple comparisons test; \* $p < 0.05$ .

| Library | Compound                        | Target (in order of selectivity) | % FI (CTB) | % Lum (LCA) | % Lum SD (LCA) | Z-Score (LCA) | Z-Score SD (LCA) | Signif? |
|---------|---------------------------------|----------------------------------|------------|-------------|----------------|---------------|------------------|---------|
| Broad   | BIO                             | GSK3, Pan-JAK                    | 99.38      | 3.86        | 0.41           | -10.33        | 0.22             | Yes     |
| Broad   | Fedratinib                      | JAK2                             | 101.76     | 37.94       | 2.00           | -6.61         | 0.62             | Yes     |
| Broad   | NVP-BSK805                      | JAK2                             | 100.40     | 43.03       | 44.41          | -5.91         | 4.59             | Yes     |
| Broad   | momelotinib                     | JAK1/2                           | 100.95     | 59.89       | 5.98           | -4.30         | 0.60             | Yes     |
| Broad   | ruxolitinib                     | JAK1/2                           | 99.25      | 190.89      | 70.91          | 9.57          | 7.64             | Yes     |
| Selleck | WP1066                          | JAK2, STAT3/5, ERK1/2            | 85.91      | 9.34        | 3.37           | -10.67        | 4.12             | Yes     |
| Selleck | Gandotinib (LY2784544)          | JAK2, JAK1/3, FLT3, FGFR2        | 80.72      | 16.82       | 10.01          | -9.45         | 3.18             | Yes     |
| Selleck | Pacritinib (SB1518)             | JAK2, FLT3                       | 100.37     | 38.31       | 11.31          | -6.76         | 1.97             | Yes     |
| Selleck | NVP-BSK805 2HCl                 | JAK2                             | 80.00      | 38.89       | 15.18          | -6.57         | 1.71             | Yes     |
| Selleck | TG101209                        | JAK2, FLT3                       | 85.58      | 36.58       | 12.97          | -6.49         | 1.18             | Yes     |
| Selleck | TG101348 (SAR302503)            | JAK2                             | 93.54      | 41.73       | 13.30          | -5.84         | 0.86             | Yes     |
| Selleck | AZ 960                          | JAK2                             | 88.27      | 46.37       | 9.32           | -5.64         | 1.38             | Yes     |
| Selleck | Tofacitinib (CP-690550) Citrate | JAK3                             | 99.11      | 74.80       | 1.82           | -2.18         | 0.71             | No      |
| Selleck | XL019                           | JAK1/2 > JAK3                    | 106.34     | 139.69      | 18.71          | 5.87          | 2.63             | Yes     |
| UTK     | 420121                          | JAK3, JAK1, EGFR, TGM2           | 92.34      | 31.63       | 0.39           | -9.24         | 2.51             | Yes     |
| UTK     | WP1066                          | JAK2, STAT3/5, ERK1/2            | 92.85      | 11.70       | 6.19           | -9.11         | 3.61             | Yes     |
| UTK     | 420126                          | JAK3 > JAK2                      | 102.85     | 29.43       | 4.50           | -8.84         | 1.11             | Yes     |
| UTK     | ZM 39923 hydrochloride          | JAK3, JAK1, EGFR, TGM2           | 99.52      | 26.02       | 15.32          | -7.59         | 2.12             | Yes     |
| UTK     | ZM 449829                       | JAK3, EGFR, JAK1 and CDK4        | 110.28     | 32.86       | 20.54          | -7.07         | 2.68             | Yes     |
| UTK     | ZM 449829                       | JAK3, EGFR, JAK1 and CDK4        | 106.51     | 32.67       | 20.68          | -7.01         | 2.68             | Yes     |
| UTK     | TG101209                        | JAK2, FLT3                       | 94.65      | 41.16       | 12.43          | -5.79         | 1.67             | Yes     |
| UTK     | Pacritinib (SB1518)             | JAK2, FLT3                       | 95.32      | 43.54       | 3.68           | -5.58         | 1.63             | Yes     |
| UTK     | RO495                           | JAK (TYK2 family kinases)        | 102.28     | 48.67       | 4.50           | -5.35         | 2.46             | Yes     |
| UTK     | 420104                          | JAK3, EGFR, Src, Abl, VEGFR      | 99.97      | 71.58       | 3.00           | -3.34         | 1.11             | No      |
| UTK     | INCB018424 (Ruxolitinib)        | JAK1, JAK2                       | 91.94      | 45.83       | 15.67          | -3.18         | 1.03             | No      |
| UTK     | CP690550 (Tofacitinib)          | JAK3                             | 101.79     | 73.55       | 3.80           | -2.46         | 1.05             | No      |
| UTK     | AG-490                          | JAK-2                            | 107.10     | 75.98       | 6.42           | -2.22         | 0.60             | No      |
| UTK     | WHI-P131 (JAK3 Inhibitor 1)     | JAK3                             | 111.65     | 129.30      | 17.72          | 2.98          | 1.92             | No      |
| UTK     | XL019                           | JAK1/2 > JAK3                    | 97.70      | 154.82      | 26.57          | 5.34          | 1.75             | Yes     |
| UTK     | Baricitinib (LY3009104)         | JAK                              | 97.63      | 141.36      | 16.32          | 5.46          | 3.75             | Yes     |
| UTK     | INCB424-Analogue                | JAK1, JAK2                       | 98.90      | 150.25      | 16.53          | 5.95          | 1.91             | Yes     |
| Broad   | ibrutinib                       | Src, BTK                         | 97.43      | 35.52       | 5.57           | -6.82         | 2.48             | Yes     |
| Broad   | saracatinib                     | Src, Bcr-Abl                     | 100.21     | 49.14       | 5.44           | -5.41         | 1.95             | Yes     |
| Broad   | dasatinib                       | Src, Bcr-Abl, many RTK           | 104.49     | 50.67       | 7.32           | -5.22         | 0.63             | Yes     |



|         |                                 |                                 |        |        |       |       |      |     |
|---------|---------------------------------|---------------------------------|--------|--------|-------|-------|------|-----|
| Broad   | KX2-391                         | Src, non-ATP competitive        | 99.74  | 203.46 | 35.83 | 10.90 | 6.59 | Yes |
| Selleck | Rebastinib (DCC-2036)           | Src, Bcr-Abl                    | 105.65 | 35.74  | 7.18  | -7.34 | 2.56 | Yes |
| Selleck | Danusertib (PHA-739358)         | Src, aurora                     | 115.28 | 51.09  | 7.36  | -4.41 | 1.61 | Yes |
| Selleck | Ibrutinib (PCI-32765)           | Src, BTK                        | 76.72  | 52.96  | 17.02 | -4.19 | 0.28 | Yes |
| Selleck | Dasatinib                       | Src, Bcr-Abl                    | 94.48  | 65.25  | 13.05 | -3.11 | 0.24 | Yes |
| Selleck | Src I1                          | Src family                      | 97.19  | 74.13  | 10.11 | -2.27 | 1.07 | No  |
| Selleck | PP1                             | Src family                      | 107.74 | 112.33 | 38.43 | 2.32  | 2.96 | No  |
| Selleck | PP2                             | Src family                      | 101.66 | 128.01 | 38.76 | 5.49  | 4.77 | No  |
| Selleck | KX2-391                         | Src, non-ATP competitive        | 93.04  | 173.26 | 27.55 | 10.85 | 7.81 | Yes |
| UTK     | Src Kinase Inhibitor I (567805) | Src > Lck                       | 110.37 | 42.58  | 26.84 | -8.22 | 3.09 | Yes |
| UTK     | Bosutinib(SKI-606)              | Src-bcr-Abl                     | 92.90  | 25.29  | 8.47  | -7.89 | 1.96 | Yes |
| UTK     | Quercetin(Sophoretin)           | Src, PI 3-K, PKC                | 99.45  | 31.79  | 7.32  | -5.83 | 2.25 | Yes |
| UTK     | PCI-32765 (Ibrutinib)           | Src                             | 96.28  | 41.59  | 8.13  | -5.43 | 1.58 | Yes |
| UTK     | NVP-BHG712                      | Src-Bcr-Abl, VEGFR, Raf         | 115.48 | 49.99  | 5.26  | -5.37 | 2.63 | Yes |
| UTK     | Dasatinib                       | Src-bcr-Abl                     | 94.44  | 46.37  | 2.72  | -5.35 | 1.93 | Yes |
| UTK     | AT9283                          | Src-bcr-Abl, Aurora, FLT-3, JAK | 97.65  | 32.24  | 6.70  | -5.04 | 1.91 | Yes |
| UTK     | AZD0530(Saracatinib)            | Src-bcr-Abl                     | 93.47  | 52.51  | 10.43 | -3.46 | 0.00 | Yes |
| UTK     | 1-Naphthyl PP1                  | Src family                      | 118.05 | 71.92  | 21.79 | -2.46 | 1.59 | No  |
| UTK     | PHA-739358(Danusertib)          | Src-bcr-Abl, Aurora, FGFR       | 100.20 | 65.60  | 9.33  | -2.18 | 0.64 | Yes |
| UTK     | KX2-391                         | Src, non-ATP competitive        | 103.11 | 221.92 | 25.01 | 15.20 | 5.79 | Yes |

| Condition                                | Peak density (pA/pF)             | Activation (mV)                 | $K_{act}$ (mV)              | Steady-state Inactivation (mV) | $K_{inact}$ (mV) | Tau ( $\tau$ ) (ms)            |
|------------------------------------------|----------------------------------|---------------------------------|-----------------------------|--------------------------------|------------------|--------------------------------|
| GFP (DMSO)                               | -59.4 ± 6.0 (15)                 | -26.03 ± 1.1 (14)               | 3.5 ± 0.2 (12)              | -62.6 ± 0.9 (12)               | 7.1 ± 0.4 (12)   | 1.2 ± 0.05 (10)                |
| GFP (Fedratinib)                         | -51.5 ± 3.7 (13)                 | -25.7 ± 1.7 (13)                | 3.9 ± 0.2 (12)              | -61.7 ± 1.0 (15)               | 6.0 ± 0.4 (11)   | 1.3 ± 0.07 (13)                |
| FGF14-GFP (DMSO)                         | -24.9 ± 3.0 (16) <sup>a</sup>    | -22.4 ± 1.1 (12) <sup>c</sup>   | 4.7 ± 0.2 (10) <sup>f</sup> | -59.8 ± 0.5 (12) <sup>h</sup>  | 6.3 ± 0.4 (12)   | 1.6 ± 0.1 (14) <sup>i</sup>    |
| FGF14-GFP (Fedratinib)                   | -81.3 ± 11.3 (13) <sup>b,j</sup> | -30.5 ± 1.9 (13) <sup>d,e</sup> | 2.8 ± 0.3 (11) <sup>g</sup> | -60.8 ± 1.3 (16) <sup>n</sup>  | 5.9 ± 0.6 (14)   | 1.4 ± 0.06 (12)                |
| FGF14 <sup>Y158A</sup> -GFP (DMSO)       | -23.97 ± 4.8 (12)                | -22.06 ± 1.4 (12)               | 4.2 ± 0.3 (12)              | -59.3 ± 2.0 (12)               | 8.5 ± 1.1 (12)   | 1.5 ± 0.12 (12) <sup>k</sup>   |
| FGF14 <sup>Y158A</sup> -GFP (Fedratinib) | -26.65 ± 3.5 (13)                | -22.69 ± 1.2 (13)               | 4.3 ± 0.4 (13)              | -61.7 ± 2.2 (12)               | 8.4 ± 0.6 (12)   | 1.8 ± 0.11 (12) <sup>l,m</sup> |

**Supplementary Table 3. Effect of Fedratinib on Nav1.6-mediated currents in the presence of FGF14 or the FGF14<sup>Y158A</sup> mutant.** Data are mean ± SEM (*n*).

<sup>a</sup>  $P < 0.0001$ , unpaired *t* tests compared to Nav1.6-GFP (DMSO)

<sup>b</sup>  $P < 0.0001$ , unpaired *t* tests compared to FGF14-GFP (DMSO).

<sup>c</sup>  $P < 0.0358$ , unpaired *t* tests compared to Nav1.6-GFP (DMSO).

<sup>d</sup>  $P < 0.0019$ , unpaired *t* tests compared to Nav1.6-GFP (DMSO).

<sup>e</sup>  $P < 0.0495$ , unpaired *t* tests compared to FGF14-GFP (DMSO).

<sup>f</sup>  $P < 0.0017$ , unpaired *t* tests compared to Nav1.6-GFP (DMSO).

<sup>g</sup>  $P < 0.0001$ , unpaired *t* tests compared to Nav1.6-GFP (DMSO).

<sup>h</sup>  $P < 0.0144$ , unpaired *t* tests compared to Nav1.6-GFP (DMSO).

<sup>i</sup>  $P < 0.0052$ , unpaired *t* tests compared to Nav1.6-GFP (DMSO).

<sup>j</sup>  $P = 0.0883$ , unpaired *t* tests compared to Nav1.6-GFP (DMSO).

<sup>k</sup>  $P < 0.0268$ , unpaired *t* tests compared to Nav1.6-GFP (DMSO).

<sup>l</sup>  $P < 0.0003$ , unpaired *t* tests compared to Nav1.6-GFP (DMSO).

<sup>m</sup>  $P < 0.0147$ , unpaired *t* tests compared to FGF14-GFP (Fedratinib).

<sup>n</sup>  $P = 0.3072$ , unpaired *t* tests compared to Nav1.6-GFP (DMSO).

**Supplementary Table 3. Effect of Fedratinib on Passive and Active Electrical Properties of Hippocampal CA1 pyramidal neurons.** Data are mean  $\pm$  SEM (*n*).

| Condition                                | Max Num. of AP                     | RMP (mV)               | $I_{thr}$ (pA)         | $V_{thr}$ (mV)         | Max rise (mV/ms)        | Max decay (mV/ms)        | Cm (pF)                 | Rin (m $\Omega$ )       | Tau (ms)              |
|------------------------------------------|------------------------------------|------------------------|------------------------|------------------------|-------------------------|--------------------------|-------------------------|-------------------------|-----------------------|
| <i>Fgf14</i> <sup>+/+</sup> (DMSO)       | 16.3 $\pm$ 2.5<br>(4)              | -69.8 $\pm$ 2.8<br>(4) | 75.0 $\pm$ 16.6<br>(4) | -43.4 $\pm$ 2.1<br>(4) | 315.6 $\pm$ 19.7<br>(4) | -85.1 $\pm$ 13.9<br>(4)  | 117.6 $\pm$ 16.8<br>(4) | 169.4 $\pm$ 9.5<br>(4)  | 20.1 $\pm$ 3.3<br>(4) |
| <i>Fgf14</i> <sup>+/+</sup> (Fedratinib) | 11.3 $\pm$ 1.4<br>(6) <sup>a</sup> | -68.1 $\pm$ 2.0<br>(6) | 96.7 $\pm$ 12.8<br>(6) | -42.7 $\pm$ 3.0<br>(6) | 291.0 $\pm$ 19.3<br>(6) | -64.7 $\pm$ 5.1<br>(6)   | 160.8 $\pm$ 31.2<br>(6) | 121.5 $\pm$ 19.0<br>(6) | 19.1 $\pm$ 4.0<br>(6) |
| <i>Fgf14</i> <sup>-/-</sup> (DMSO)       | 13.0 $\pm$ 3.9<br>(4)              | -66.5 $\pm$ 2.1<br>(4) | 72.5 $\pm$ 8.5<br>(4)  | -40.3 $\pm$ 7.2<br>(4) | 272.2 $\pm$ 56.1<br>(4) | -69.3 $\pm$ 7.2<br>(4)   | -79.5 $\pm$ 12.2<br>(4) | 161.0 $\pm$ 19.1<br>(4) | 12.5 $\pm$ 2.2<br>(4) |
| <i>Fgf14</i> <sup>-/-</sup> (Fedratinib) | 11.8 $\pm$ 2.7<br>(5)              | -63.2 $\pm$ 2.8<br>(5) | 50.0 $\pm$ 11.4<br>(5) | -42.8 $\pm$ 1.3<br>(5) | 264.4 $\pm$ 14.2<br>(5) | -105.5 $\pm$ 14.7<br>(5) | 182.7 $\pm$ 47.1<br>(5) | 181.0 $\pm$ 12.3<br>(5) | 32.3 $\pm$ 7.5<br>(5) |

<sup>a</sup> p < 0.05, unpaired t-test compared to FGF14<sup>+/+</sup> (DMSO)
